# Supplementary material for: Catalyst-free soft-template synthesis of ordered mesoporous carbon tailored using phloroglucinol/glyoxylic acid environmentally friendly precursors
Source: Royal Society of Chemistry journal article supplement (doi:10.1039/c4gc00269e), 2014-01-01
Supplement: c4gc00269e1.pdf [file c4gc00269e1.pdf]

**Catalyst-free soft-template synthesis of ordered mesoporous carbon tailored by  
phloroglucinol/glyoxylic acid environmentally friendly precursors**

Camelia Matei Ghimbeu\*, Loïc Vidal, Luc Delmotte, Jean-Marc Le Meins, Cathie Vix-Guterl

Institut de Science des Matériaux de Mulhouse, CNRS UMR 7361, 15 rue Jean Starcky,  
68057 Mulhouse-France

*\*Corresponding author:*

*Phone: +33 389 60 87 43*

*E-mail: camelia.ghimbeu@uha.fr*

*Manuscript submitted for publication in Green Chemistry*

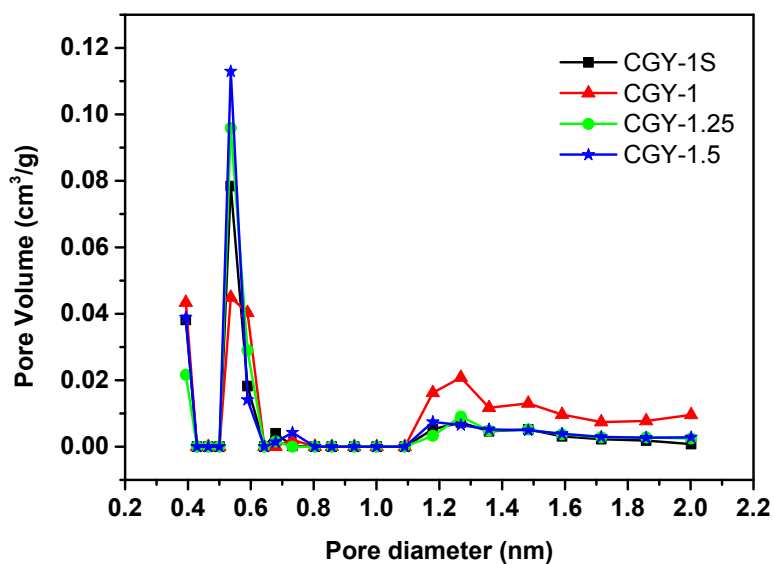

**Figure S1:** DFT pore size distribution of carbon powders obtained using different experimental conditions

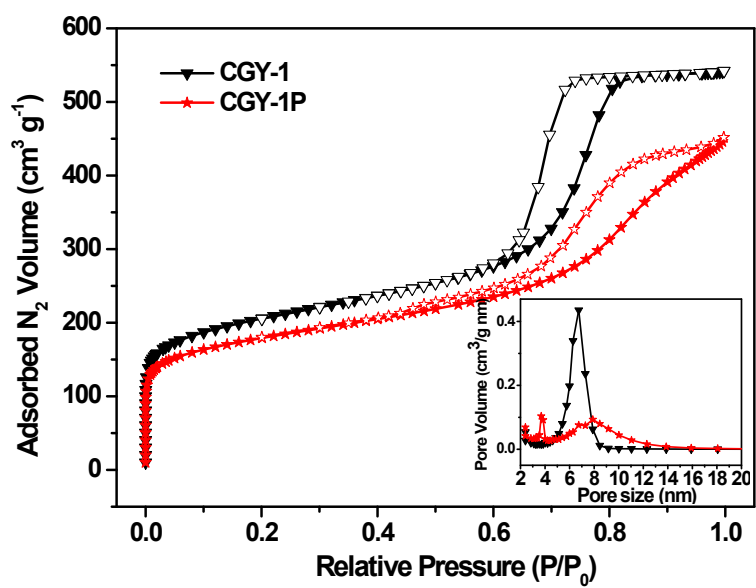

**Figure S2:** Nitrogen adsorption/desorption isotherms of carbon powders obtained by EISA (CGY-1) and by phase separation (CGY-1P)

**Table S1:**

| Carbon Material | $S_{\text{BET}}$<br>$\text{m}^2 \text{g}^{-1}$ | $V_{\text{t}}$<br>$\text{cm}^3 \text{g}^{-1}$ | $V_{\text{micro}}$<br>$\text{cm}^3 \text{g}^{-1}$ | $V_{\text{meso}}$<br>$\text{cm}^3 \text{g}^{-1}$ | $D_{\text{p}}$<br>nm |
|-----------------|------------------------------------------------|-----------------------------------------------|---------------------------------------------------|--------------------------------------------------|----------------------|
| CGY-1           | 679                                            | 0.83                                          | 0.34                                              | 0.49                                             | 6.5                  |
| CGY-1T          | 445                                            | 0.66                                          | 0.17                                              | 0.49                                             | 6.0                  |
| CGY-1P          | 588                                            | 0.65                                          | 0.29                                              | 0.36                                             | 7.2                  |

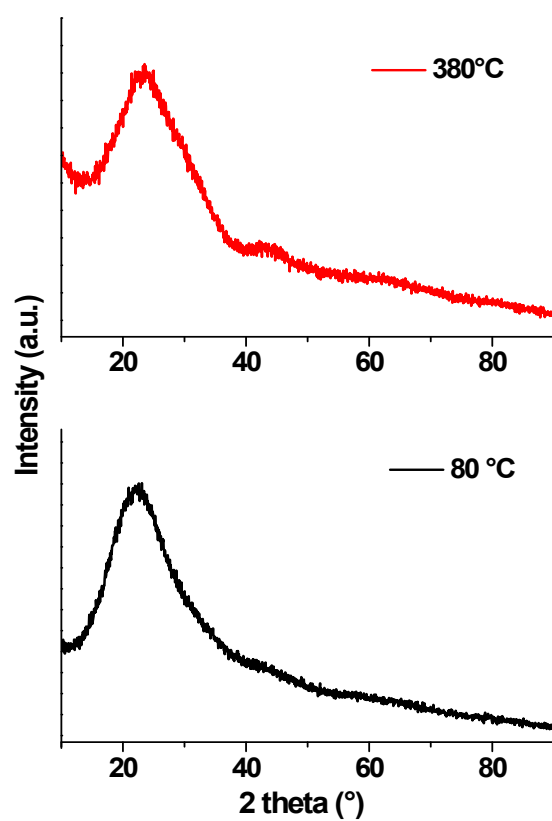

Figure S3: XRD patterns of CGY-1 resin thermally treated at 80°C and subsequently at 380°C

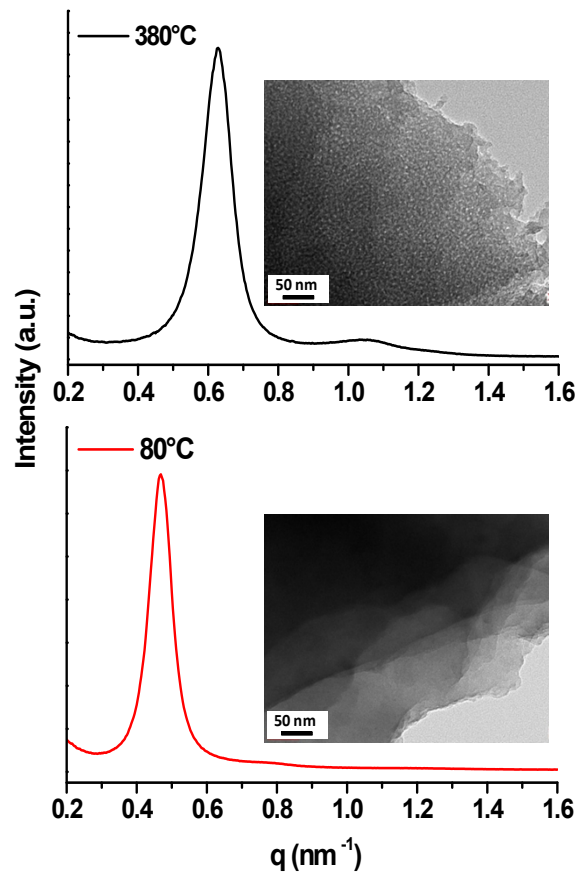

Figure S4: SAXS patterns (in-situ : TEM pictures) of phenolic resin CGY-1.5 heat treated at 80°C and 380°C respectively

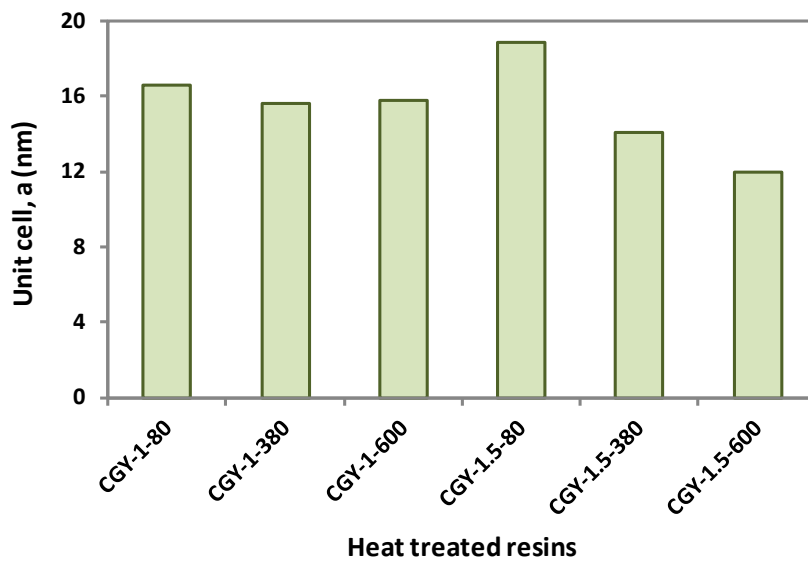

Figure S5: Unit cell variation with the temperature as determined by SAXS patterns
